# Supplementary material for: Seroprevalence and Incidence of hepatitis E in Blood Donors in Upper Austria
Source: PLoS One. 2015 Mar 9;10(3):e0119576. doi: 10.1371/journal.pone.0119576 (PMC4353625; doi:10.1371/journal.pone.0119576)
Supplement: S2 Table — (XLSX) [file pone.0119576.s002.xlsx]

## Sheet: Table S2
Table S2: Results of IgG and IgM antibodies from HEV RNA positive donors
donor		weeks after donation	date	IgG	IgG	IgM	IgM
1		0	2013-03-01	0.114	negativ	0.014	negativ
		6.1	2013-04-12	18.39	positiv	3.784	positiv
2		0	2013-04-10	0.25	negativ	0.034	negativ
		4.1	2013-05-08	12.175	positiv	5.155	positiv
3		0	2013-09-23	0.042	negativ	0.023	negativ
		1.5	2013-10-04	7.105	positiv	3.43174	positiv
		11	2013-12-09	20.271	positiv	0.893	negativ
4		0	2013-11-13	0.035	negativ	0.017	negativ
		0.7	2013-11-18	7.426	positiv	7.261	positiv
		5.1	2013-12-17	19.065	positiv	4.282	positiv
5		0	2014-02-10	0.079	negativ	0.103	negativ
		2	2014-02-24	2.994	positiv	7.97631	positiv
		7.1	2014-04-02	20.0363	positiv	13.1926	positiv
6		0	2014-03-07	0.0373684	negativ	0.241444	negativ
		2	2014-03-21	11.1678	positiv	4.00903	positiv
7		0	2014-03-13	0.533684	negativ	0.0172997	negativ
		1	2014-03-20	19.5784	positiv	4.13501	positiv
		5.2	2014-04-24	20.28	positiv	1.31516	positiv
IgG and IgM calculation according to manufactors ininstruction
